# Supplementary material
Source: Research Square preprint supplement (doi:10.21203/rs.3.rs-8918556/v1)
Supplement: Supplementary file 1 [file 79ef1b9cb450f71e13423c2b.docx]

**Appendix 1.**

**Supplementary information**

**Database search terms**

pelvic organ prolapse and stress urinary incontinence and

transvaginal OR "vaginal surgical mesh" OR mesh OR "tension-free vaginal tape" OR "transvaginal mesh" OR "vaginal mesh implant*" OR "mesh injur*" OR sub urethral OR sling and

complications OR injur* OR "adverse effect*" and

sex* OR intima* OR relation* OR "quality of life" OR qol OR "personal li*" OR "social science" or sociological

**Advanced google search**

pelvic organ prolapse and stress urinary incontinence and

transvaginal OR "vaginal surgical mesh" OR mesh OR "tension-free vaginal tape" OR "transvaginal mesh" OR "vaginal mesh implant*" OR "mesh injur*" OR sub urethral OR sling and

complications OR injur* OR "adverse effect*" and

sex* OR intima* OR relation* OR "quality of life" OR qol OR "personal li*" OR "social science" or sociological and government OR committee OR parliament OR NHS
